# Supplementary material for: Development of an adherence-enhancing intervention in topical treatment termed the topical treatment optimization program (TTOP)
Source: PubMed Central journal article supplement (PMC4139584; doi:10.1007/s00403-014-1475-5), 2014-06-04
Supplement: 403_2014_1475_MOESM3_ESM.pdf [file 403_2014_1475_MOESM3_ESM.pdf]

**Development of an adherence enhancing intervention in topical treatment termed the Topical Treatment Optimization Program (TTOP)**

**Archives of Dermatological Research**

Kristian Reich<sup>a</sup>, Ulrich Mrowietz<sup>b</sup>, Eleni Karakasili<sup>c</sup>, Ina Zschocke<sup>c\*</sup>

<sup>a</sup>Dermatologikum Hamburg, Stephansplatz 5, 20354, Hamburg, Germany

<sup>b</sup>Psoriasis-Center, Department of Dermatology, University Medical Center Schleswig-Holstein, Schittenhelmstraße. 7, 24105, Kiel, Germany

<sup>c</sup>SCIderm GmbH, Drehbahn 1-3, 20354, Hamburg, Germany

\*Corresponding Author:

Ina Zschocke

SCIderm GmbH

Drehbahn 1-3

20354 Hamburg

Germany

Phone: +49-040-55 44 010

Fax: +49-40-55 44 01 291

Email: [ina.zschocke@sciderm.com](mailto:ina.zschocke@sciderm.com)

## Online Resource 3 General Patient Encounter Guide

### A General Patient Encounter Guide\*

Please consider the following when meeting with your patient.

#### 1. Hand washing/other sanitizer

Do it • Make sure your patient sees you do it. • Either one alone is not good enough.

#### 2. Polite greeting

Eye contact and handshake both at start and end of consultation visit. • Acknowledgement of everyone in the room.

#### 3. Sit, lean forward, use silence and be calm

#### 4. Ask open ended questions

For example: 'How are you today?' or 'Is there anything else?'

Don't interrupt • If there are too many issues, make clear what you have to focus on/what you have time for during this consultation. • However, acknowledge the patient's needs.

#### 5. When taking the history

Ask how psoriasis affects life and offer sympathy. • If possible, use ungloved hands when assessing affected skin areas.

#### 6) Provide explanations and be open, honest and responding about any aspect of the care you can provide

Tell the patient what and why you are doing. • Tell the patient what comes next • Inform the patient about the disease • Inform the patient about the therapy • Inform the patient about the effect and side effects that he may expect from the therapy

#### 7) Provide written education materials when/where available

#### 8) Ask if the patient has questions and recognize when a lot of information is being provided

Encourage patient to write down any questions and bring them along to a next visit.

#### 9) Follow up

Provide contact information and opportunity for follow up. • Reinforce the importance of adherence to the provided therapy at every consultation/contact. • Ask patients for feedback.

\* This guide has been adapted from E.E. Uhlenhake et al. J. Derm. Treatm. 2010, 21, 6-12.
